# Supplementary material for: “One-pot” synthesis and shape control of ZnSe semiconductor nanocrystals in liquid paraffin
Source: Royal Society of Chemistry journal article supplement (doi:10.1039/c0jm00115e), 2010-01-01

## **Supporting information:**

### **“One-Pot” Synthesis and Shape Control of ZnSe Semiconductor Nanocrystals in Liquid Paraffin**

*Yi Liu, Yue Tang, Yang Ning, Minjie Li, Hao Zhang<sup>\*</sup>, and Bai Yang*

*State Key Laboratory of Supramolecular Structure and Materials, College of Chemistry,*

*Jilin University, Changchun 130012, P. R. China*

*E-mail: hao\_zhang@jlu.edu.cn*

**Figure S1.** TEM images of ZnSe NCs synthesized with the Zn:Se ratio of 1:2:0.4 (a), 1:2:0.5 (b), and 1:2:0.75 (c). The precursor concentration was 0.067 mol/L, and the heating rate was 4.5 °C/min.

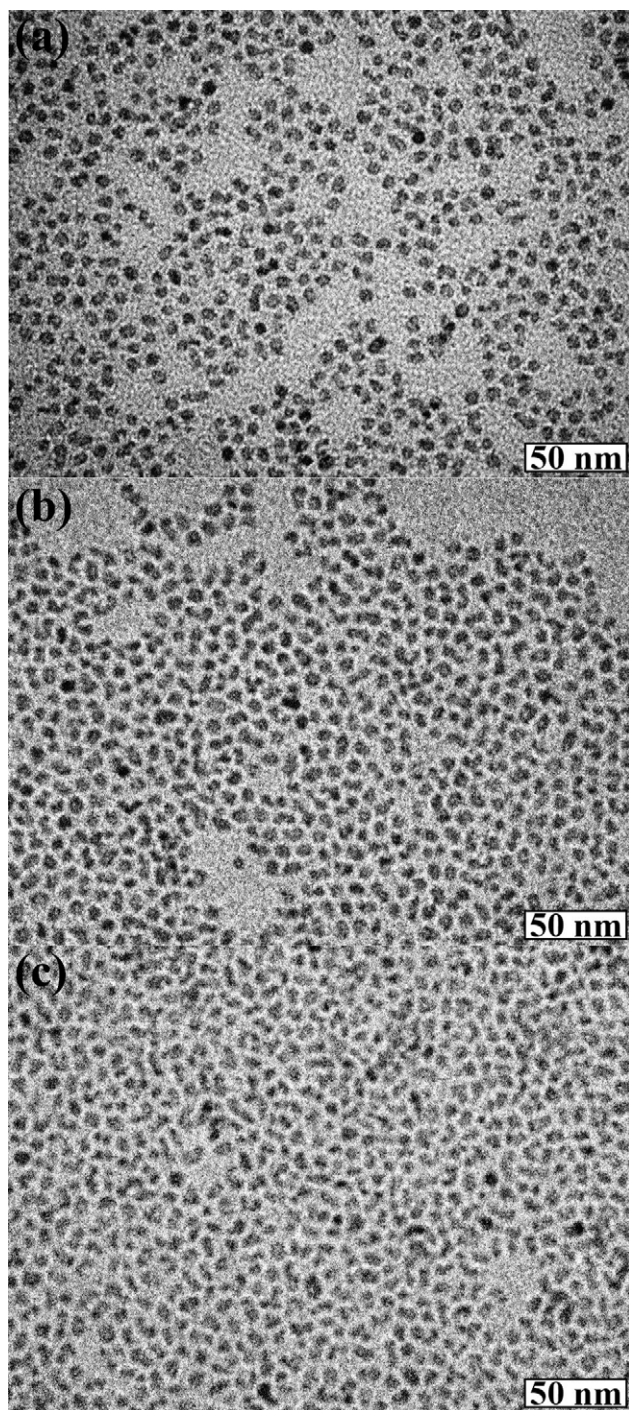

Supplement: c0jm00115e.pdf [file c0jm00115e.pdf]
